# Supplementary material for: An unsymmetrically sandwiched bis(O3S2-macrocycle) lead(ii) complex via an endo/exo-coordination mode
Source: Royal Society of Chemistry journal article supplement (doi:10.1039/d4ce01045k), 2024-12-03
Supplement: d4ce01045k1.pdf [file d4ce01045k1.pdf]

## **Electronic supplementary information**

**for**

### **An unsymmetrically sandwiched bis(O3S2-macrocycle) lead(II) complex via an endo/exo-coordination mode**

Seulgi Kim,\* Kyunghye Ju, Taehun Kim and In-Hyeok Park\*

*Graduate School of Analytical Science and Technology, Chungnam National University, Daejeon 34134, Republic of Korea*

## Experimental

### General procedures

All chemicals and solvents used in the syntheses were of reagent grade and were used without further purification. ESI-mass spectra were obtained employing a Thermo Scientific LCQ Fleet spectrometer. The FT-IR spectra were recorded using Varian 640-IR FT-IR Spectrometer with KBr pellets. The elemental analysis was carried out using a Thermo Scientific Flash 2000 Series elemental analyser. The nuclear magnetic resonance (NMR) spectra were recorded on a Bruker 500 (500 MHz). FT-IR spectra are recorded using Spectrum Two FT-IR Perkinelmer with KBr pellets

### Preparation of $[\text{Pb}(\text{L})_2(\text{ClO}_4)]\text{ClO}_4 \cdot 0.5\text{CH}_2\text{Cl}_2 \cdot 0.5\text{CH}_3\text{CN}$ (**1**).

$\text{Pb}(\text{ClO}_4)_2 \cdot 3\text{H}_2\text{O}$  (14.7 mg, 0.032 mmol) in acetonitrile (1.0 mL) was added to a solution of **L** (10.0 mg, 0.027 mmol) in dichloromethane (1.0 mL). Slow evaporation of the solution afforded a colourless crystalline product **1** suitable for X-ray analysis. Yield: 32%; IR (KBr): 2935, 2886, 1598, 1492, 1449, 1292, 1246, 1090, 1069, 1045 ( $\text{ClO}_4^-$ ), 929, 764  $\text{cm}^{-1}$ . Grinding the product for microanalysis led to removing the solvent molecules to yield a product. Anal. calc. for  $\text{C}_{40}\text{H}_{48}\text{Cl}_2\text{O}_{14}\text{PbS}_4$ : C, 41.45; H, 4.17. Found: C, 41.65.; H, 4.55%. Mass spectrum  $m/z$  (ESI): 1059 for  $[\text{Pb}(\text{L})_2(\text{ClO}_4)]^+$ .

*Caution:* Since the perchlorate compound could be explosive, it should be handled with great care!

### X-ray crystallographic analysis

Crystal data were collected on a Bruker SMART APEX II ULTRA diffractometer equipped with graphite monochromated Mo  $K\alpha$  radiation ( $\lambda = 0.71073 \text{ \AA}$ ). Data collection, data reduction and semi-empirical absorption correction were carried out using the software package of APEX2.<sup>S1</sup> All of the calculations for the structure determination were carried out using the SHELXTL package.<sup>S2</sup> Relevant crystal data collection and refinement data are summarised in Table S1.

CCDC 2389314 (**1**) contain supplementary crystallographic data for this paper. These data can be obtained free of charge from The Cambridge Crystallographic Data Centre via [www.ccdc.cam.ac.uk/data\\_request/cif](http://www.ccdc.cam.ac.uk/data_request/cif).

### References

S1. Bruker, APEX2 Version 2009.1-0 Data Collection and Processing Software (Bruker AXS Inc., Madison, Wisconsin, U.S.A., 2008).

S2. Bruker. SHELXTL-PC Version 6.22 Program for Solution and Refinement of Crystal Structures. 2001.

**Table S1** Crystallographic data and refinement parameter of **1**

| <b>1</b>                                                                             |                                                                                                  |
|--------------------------------------------------------------------------------------|--------------------------------------------------------------------------------------------------|
| Formula                                                                              | C <sub>83</sub> H <sub>101</sub> Cl <sub>6</sub> NO <sub>28</sub> Pb <sub>2</sub> S <sub>8</sub> |
| Formula weight                                                                       | 2444.20                                                                                          |
| Temperature                                                                          | 173                                                                                              |
| Crystal system                                                                       | Monoclinic                                                                                       |
| Space group                                                                          | <i>P2<sub>1</sub>/n</i>                                                                          |
| <i>Z</i>                                                                             | 2                                                                                                |
| <i>a</i> (Å)                                                                         | 15.4259(2)                                                                                       |
| <i>b</i> (Å)                                                                         | 21.5068(3)                                                                                       |
| <i>c</i> (Å)                                                                         | 15.6995(2)                                                                                       |
| $\alpha$ (°)                                                                         | 90                                                                                               |
| $\beta$ (°)                                                                          | 112.9730(10)                                                                                     |
| $\gamma$ (°)                                                                         | 90                                                                                               |
| <i>V</i> (Å <sup>3</sup> )                                                           | 4795.40(11)                                                                                      |
| <i>D</i> <sub>calc</sub> (g/cm <sup>3</sup> )                                        | 1.693                                                                                            |
| 2 $\theta$ <sub>max</sub> (°)                                                        | 52.00                                                                                            |
| <i>R</i> <sub>1</sub> , <i>wR</i> <sub>2</sub> [ <i>I</i> > 2 $\sigma$ ( <i>I</i> )] | 0.0369, 0.0745                                                                                   |
| <i>R</i> <sub>1</sub> , <i>wR</i> <sub>2</sub> [all data]                            | 0.0553, 0.0807                                                                                   |
| Goodness-of-fit on F <sup>2</sup>                                                    | 1.031                                                                                            |
| No. of reflection used [>2 $\sigma$ ( <i>I</i> )]                                    | 9419 [ <i>R</i> <sub>int</sub> = 0.0726]                                                         |
| Refinement                                                                           | 42433                                                                                            |

**Table S2** Selected bond lengths (Å) and bond angles (°) for **1**

---

|           |            |           |           |
|-----------|------------|-----------|-----------|
| Pb1-S1    | 2.9022(13) | Pb1-O1    | 2.854(3)  |
| Pb1-S2    | 2.9897(12) | Pb1-O2    | 2.806(3)  |
| Pb1-S3    | 2.9015(11) | Pb1-O3    | 2.951(1)  |
| Pb1-S4    | 3.1003(12) | Pb1-O8    | 2.781(9)  |
| <br>      |            |           |           |
| S1-Pb1-S2 | 70.19(3)   | S3-Pb1-O1 | 141.36(7) |
| S1-Pb1-S3 | 78.04(3)   | S3-Pb1-O2 | 150.36(7) |
| S1-Pb1-S4 | 68.11(3)   | S3-Pb1-O3 | 102.55(4) |
| S1-Pb1-O1 | 75.15(7)   | S3-Pb1-O8 | 83.86(3)  |
| S1-Pb1-O2 | 131.58(7)  | S4-Pb1-O1 | 74.65(7)  |
| S1-Pb1-O3 | 135.94(7)  | S4-Pb1-O2 | 115.88(7) |
| S1-Pb1-O8 | 140.93(7)  | S4-Pb1-O3 | 154.19(4) |
| S2-Pb1-S3 | 67.06(3)   | S4-Pb1-O8 | 73.21(1)  |
| S2-Pb1-S4 | 124.47(3)  | O1-Pb1-O2 | 61.58(9)  |
| S2-Pb1-O1 | 126.39(7)  | O1-Pb1-O3 | 116.07(4) |
| S2-Pb1-O2 | 119.04(7)  | O1-Pb1-O8 | 100.02(9) |
| S2-Pb1-O3 | 69.87(9)   | O2-Pb1-O3 | 58.90(3)  |
| S2-Pb1-O8 | 132.41(5)  | O2-Pb1-O8 | 71.27(2)  |
| S3-Pb1-S4 | 69.75(3)   | O3-Pb1-O8 | 81.59(1)  |

---

Recently, we have reported a poly(sandwich)-type  $\text{Cs}^+$  complex of bis-*o*-xylyl-(17-crown-5) as the first example of infinite sandwich-type macrocyclic complexes (Fig. S1a, see Type A in Scheme 1a).<sup>S1</sup> Some  $\text{Pd}^{2+}$  complexes of bis( $\text{O}_2\text{S}_2$ -macrocycle), adopting an *edge-to-edge* mode (Fig. S1b, see Type B in Scheme 1b) were isolated via mole-ratio-controlled approaches.<sup>S2, S3</sup> An unsymmetrically sandwiched silver(I) complex  $[\text{Ag}(\text{L}')_2]\text{PF}_6$  ( $\text{L}'$ :  $\text{NO}_2\text{S}_2$ -macrocycle, Fig.S1c, see Type C in Scheme 1c) also has been reported by the Lee group as the first example of this type.<sup>S4</sup>

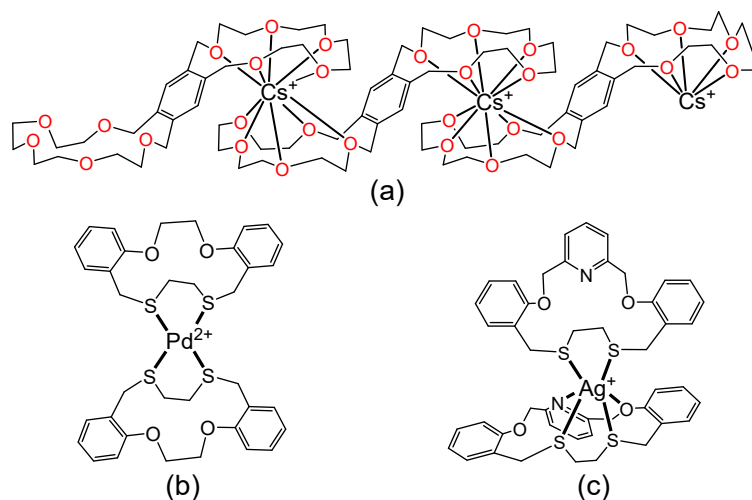

**Fig. S1** Some extended sandwich-type macrocyclic complexes reported previously: (a) one-dimensional polymeric  $\text{Cs}^+$ -complex (*face-to-face*), (b)  $\text{Pd}^{2+}$ -complex (*edge-to-edge*) and (c)  $\text{Ag}^+$ -complex (*edge-to-face*).

## References

- S1. S. Kim, I.-H. Park, S. S. Lee, W. Sim and J. Y. Lee, *CrystEngComm*, 2020, **22**, 5601-5605.  
 S2. S. Y. Lee, S. Park and S. S. Lee, *Inorg. Chem.*, 2009, **48**, 11335-11341.  
 S3. S. Y. Lee, S. Park and S. S. Lee, *Inorg. Chim. Acta*, 2009, **362**, 1047-1052.  
 S4. H. J. Kim, K. F. Sultana, J. Y. Lee and S. S. Lee, *CrystEngComm*, 2010, **12**, 1494-1500.

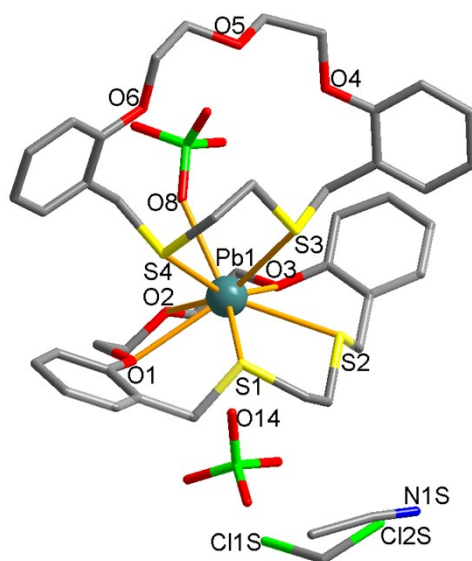

**Fig. S2** Crystal structure of  $[\text{Pb}(\text{L})_2(\text{ClO}_4)]\text{ClO}_4 \cdot 0.5\text{CH}_2\text{Cl}_2 \cdot 0.5\text{CH}_3\text{CN}$  (**1**) showing non-coordinated anion and solvent molecules.

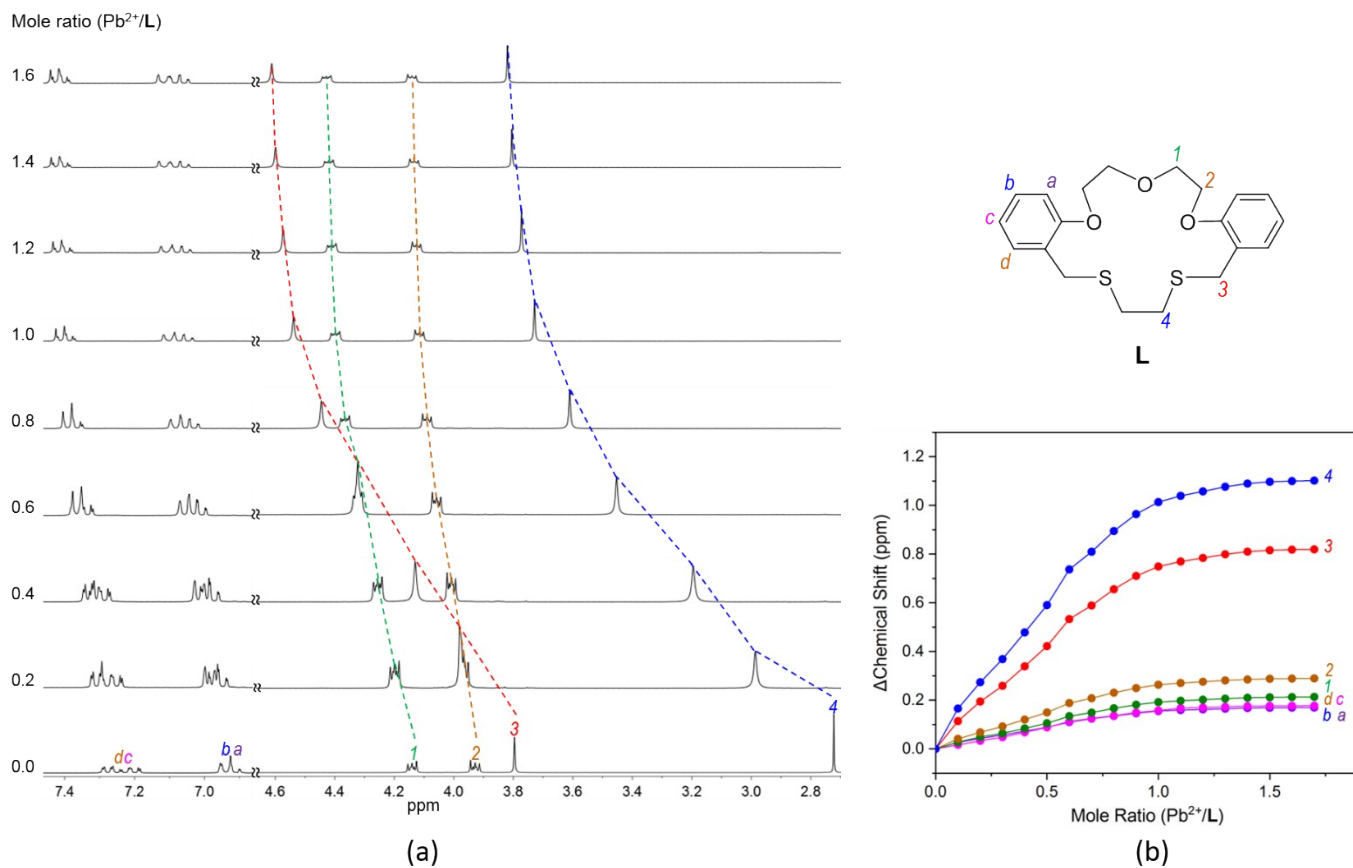

**Fig. S3** (a)  $^1\text{H}$  NMR titration of **L** ( $1.0 \times 10^{-3}$  M) with lead(II) perchlorate in  $\text{CDCl}_3/\text{CD}_3\text{CN}$  (v/v 1:1) and (b) titration curves for each proton in **L**.



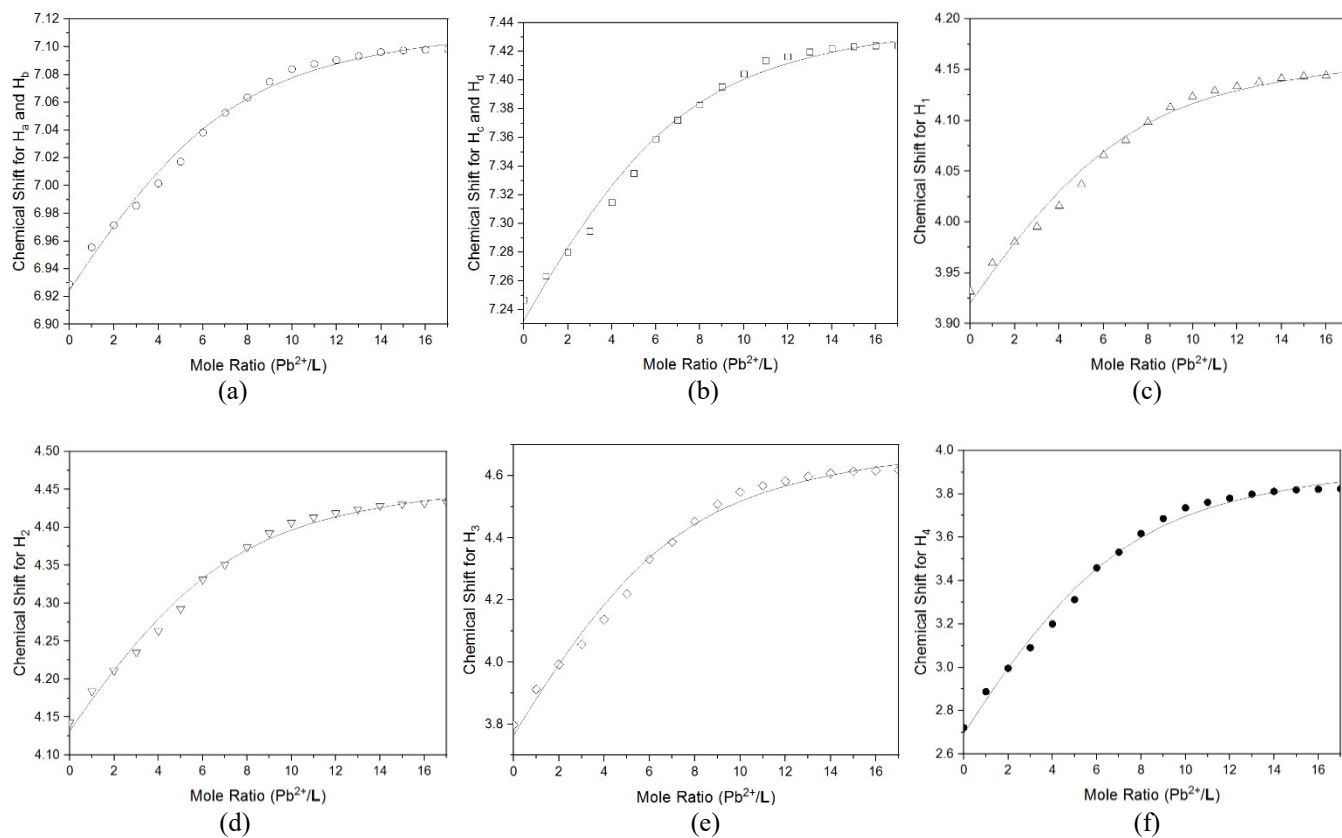

**Fig. S4** HyperNMR output for (a) H<sub>a,b</sub>, (b) H<sub>c,d</sub>, (c) H<sub>1</sub>, (d) H<sub>2</sub>, (e) H<sub>3</sub> and (f) H<sub>4</sub> signals (circles, squares and triangles: experimental points, solid lines: theoretical fit for the [PbL]<sup>2+</sup> (1:1) model).  $\log K = 5.9(5)$  for the 1:1 complexation.

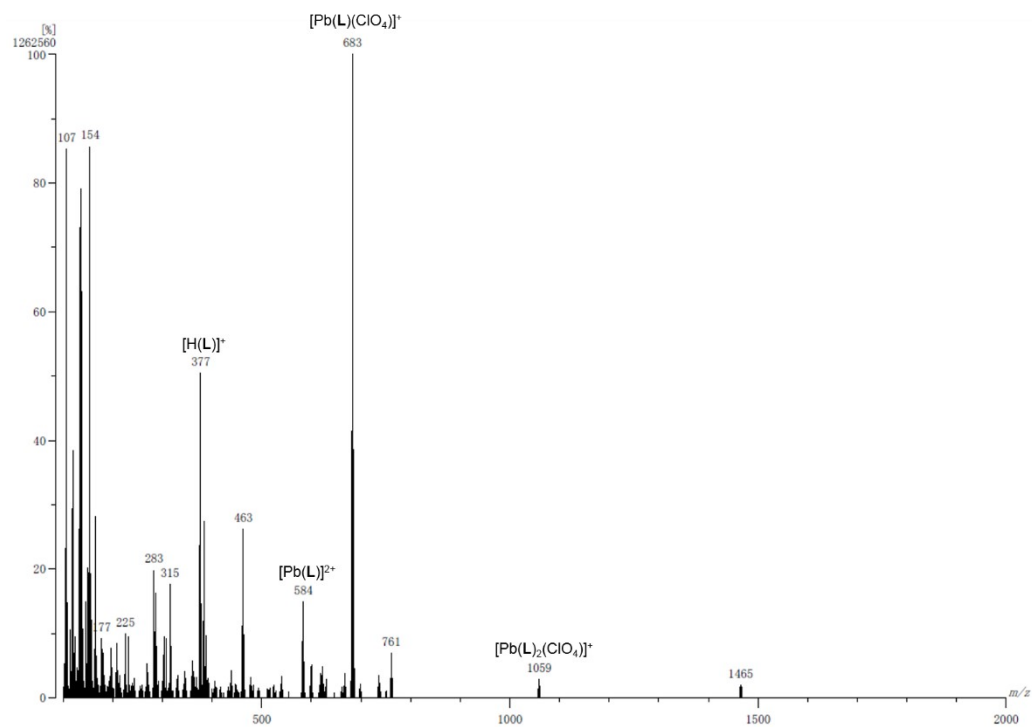

**Fig. S5** FAB-mass spectrum of **1**.

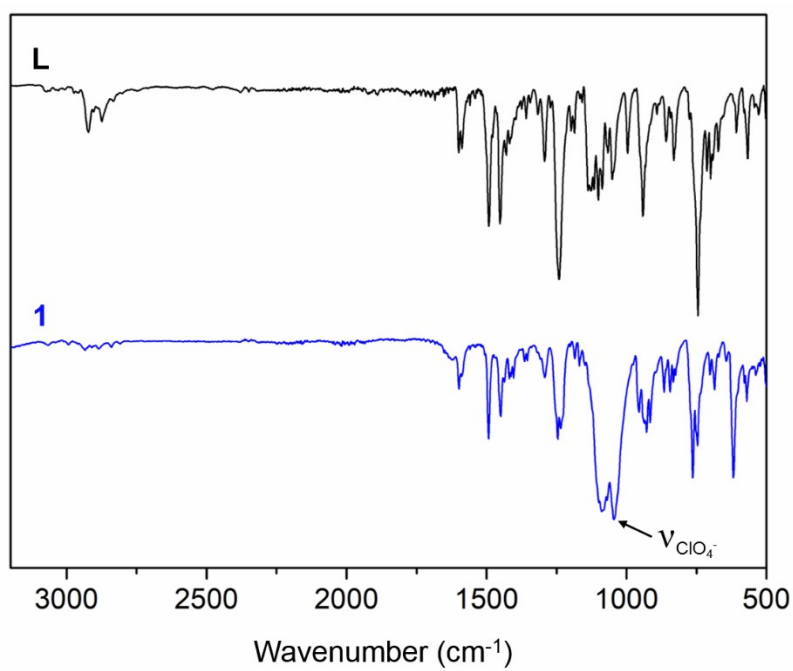

**Fig. S6** FT-IR spectra of **L** and **1**.
